# Supplementary material for: Metastable Differentially Methylated Regions within Arabidopsis Inbred Populations Are Associated with Modified Expression of Non-Coding Transcripts
Source: PubMed Central journal article supplement (PMC3447930; doi:10.1371/journal.pone.0045242), 2012-09-20

**A**

Annotation of the top 200 EST tags  
misregulated in *ago5-2*

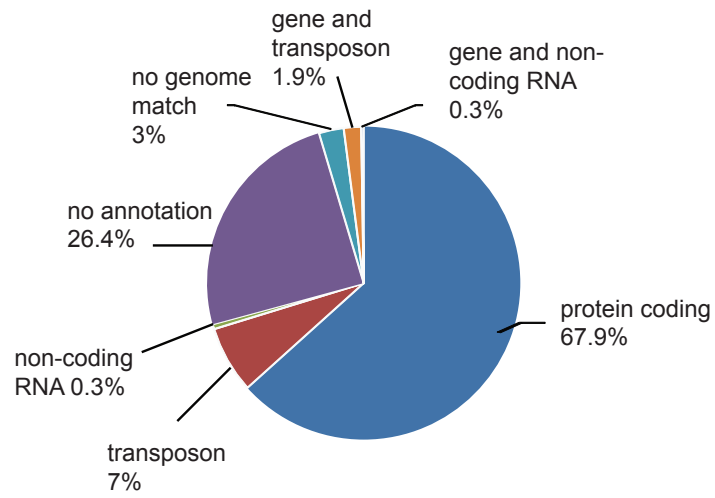**B**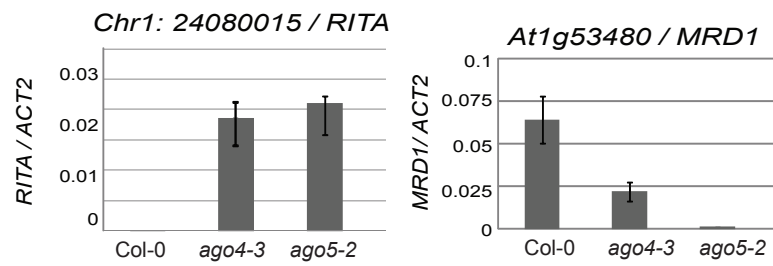**C**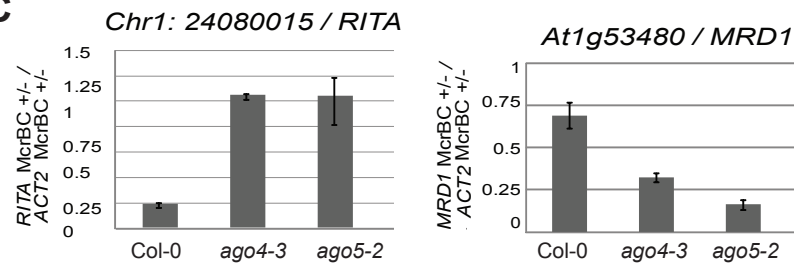

Supplement: pone.0045242.s001.pdf [file pone.0045242.s001.pdf]
