# Supplementary material for: Metastable Differentially Methylated Regions within Arabidopsis Inbred Populations Are Associated with Modified Expression of Non-Coding Transcripts
Source: PubMed Central journal article supplement (PMC3447930; doi:10.1371/journal.pone.0045242), 2012-09-20

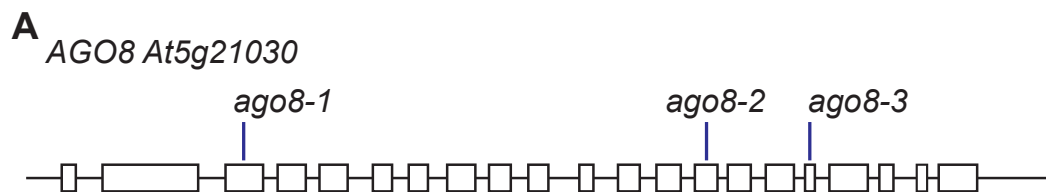

*ago8-1* SALK\_139894; predicted exon 3  
*ago8-2* SALK\_151983; predicted exon 14  
*ago8-3* SALK\_060402; predicted exon 17

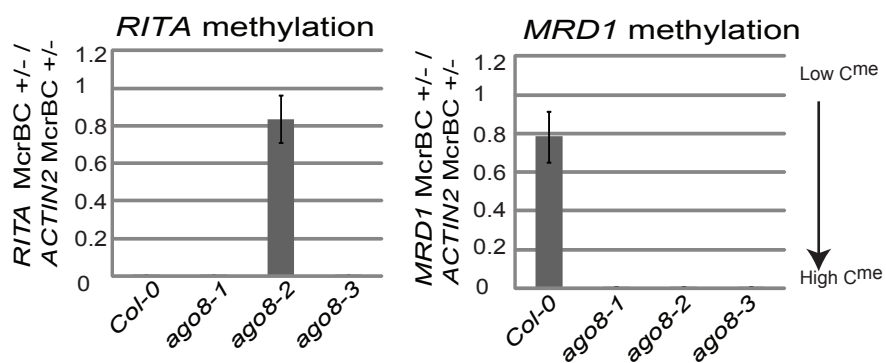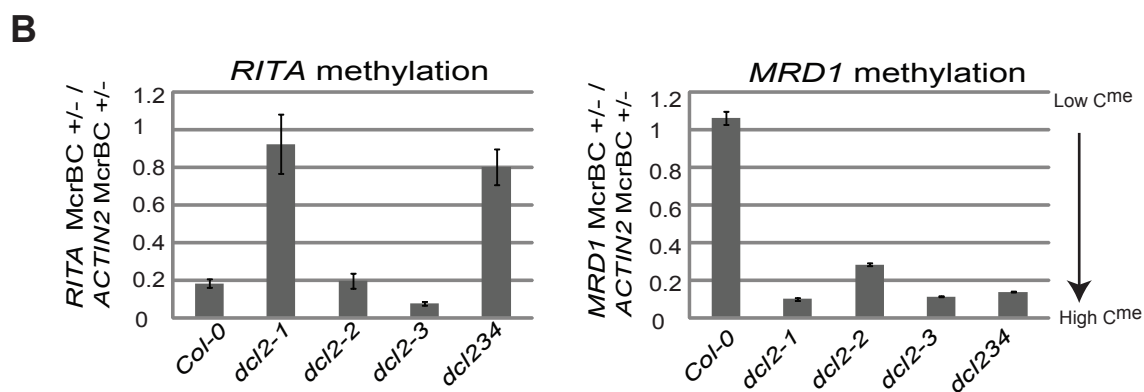

Supplement: pone.0045242.s003.pdf [file pone.0045242.s003.pdf]
