# Supplementary material for: Metastable Differentially Methylated Regions within Arabidopsis Inbred Populations Are Associated with Modified Expression of Non-Coding Transcripts
Source: PubMed Central journal article supplement (PMC3447930; doi:10.1371/journal.pone.0045242), 2012-09-20

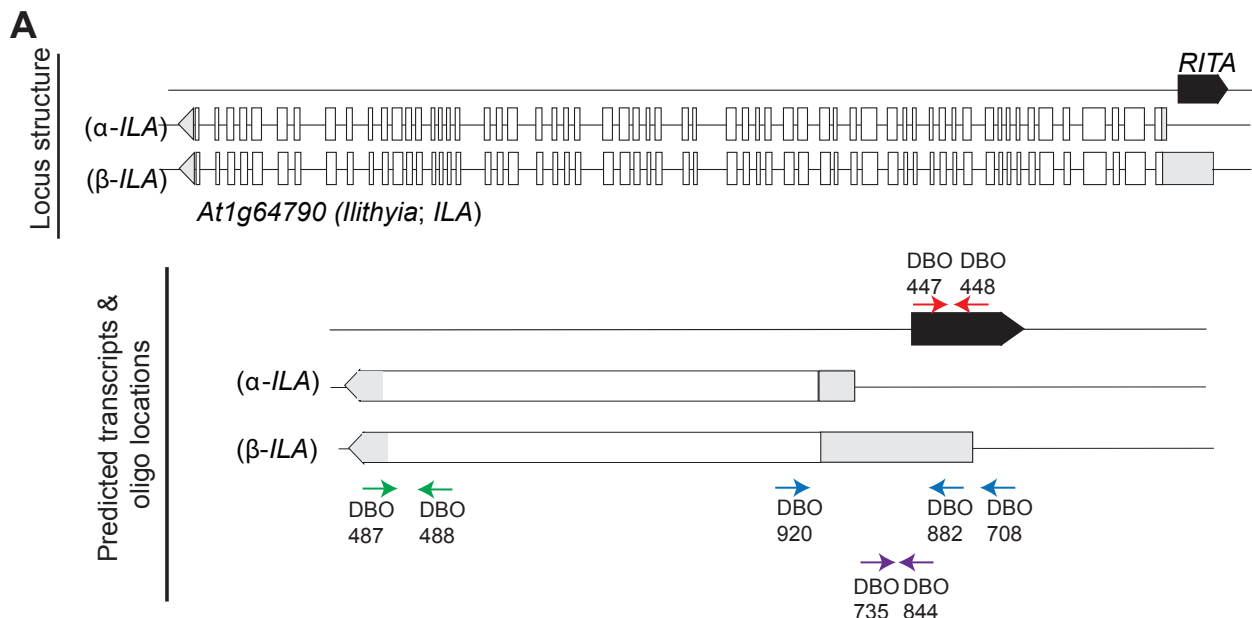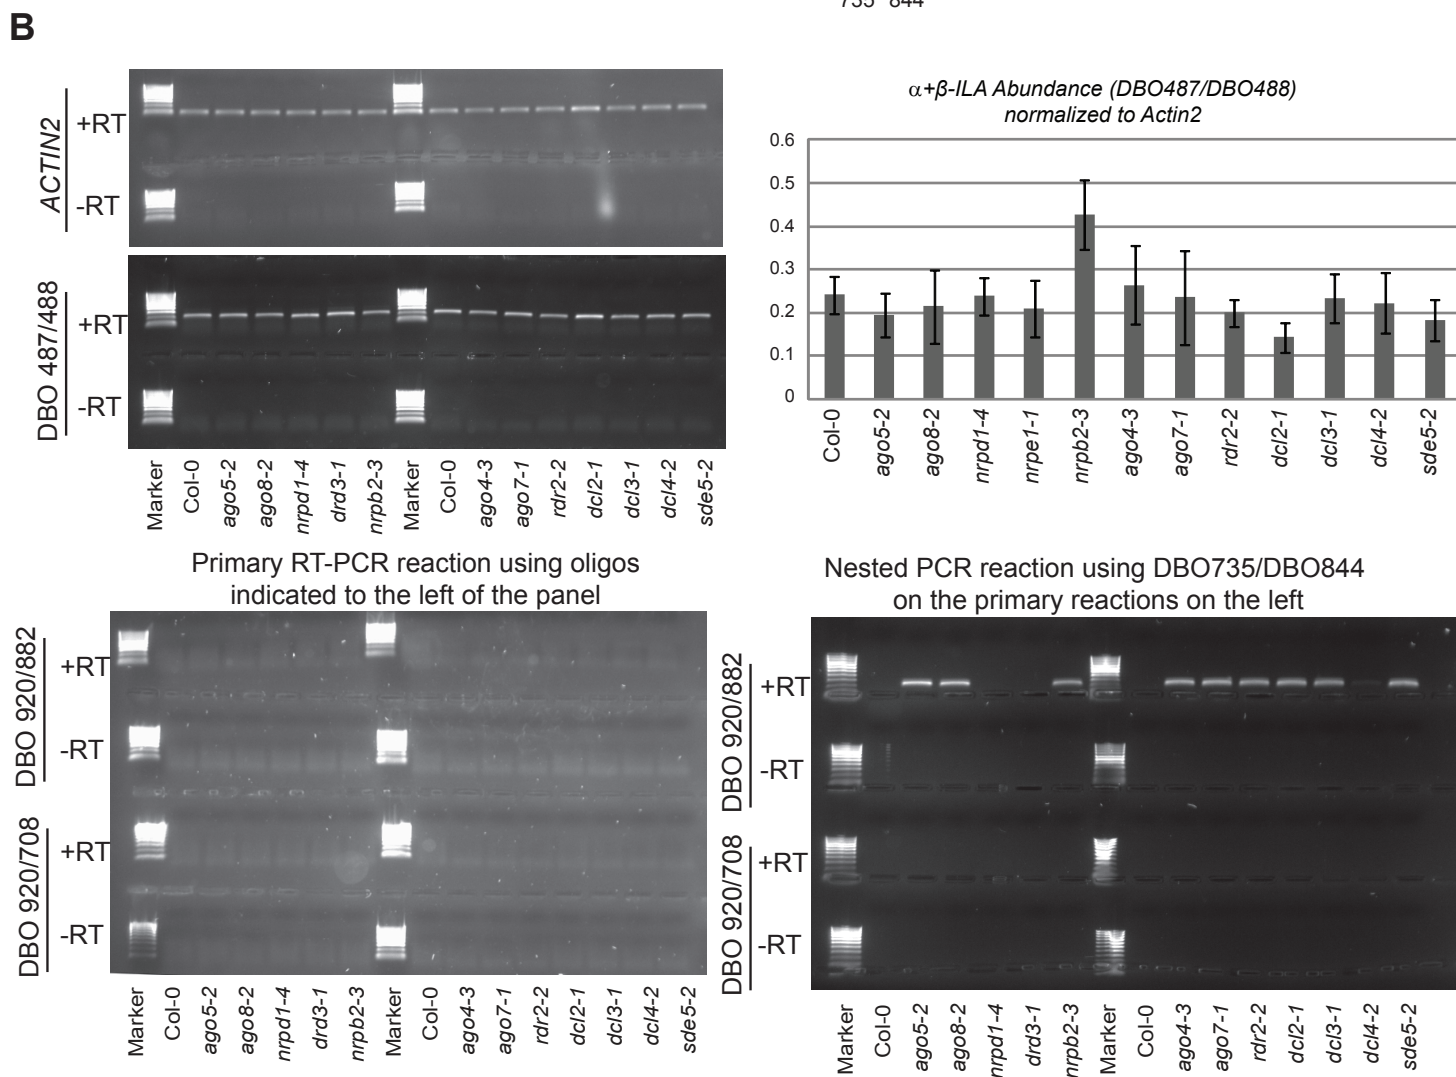

Supplement: pone.0045242.s007.pdf [file pone.0045242.s007.pdf]
